# Supplementary material for: Direct Membrane Filtration of Municipal Wastewater: Studying the Most Suitable Conditions for Minimizing Fouling Rate in Commercial Porous Membranes at Demonstration Scale
Source: MDPI journal article supplement (doi:10.3390/membranes13010099), 2023-01-12
Supplement: s1 [file s1]

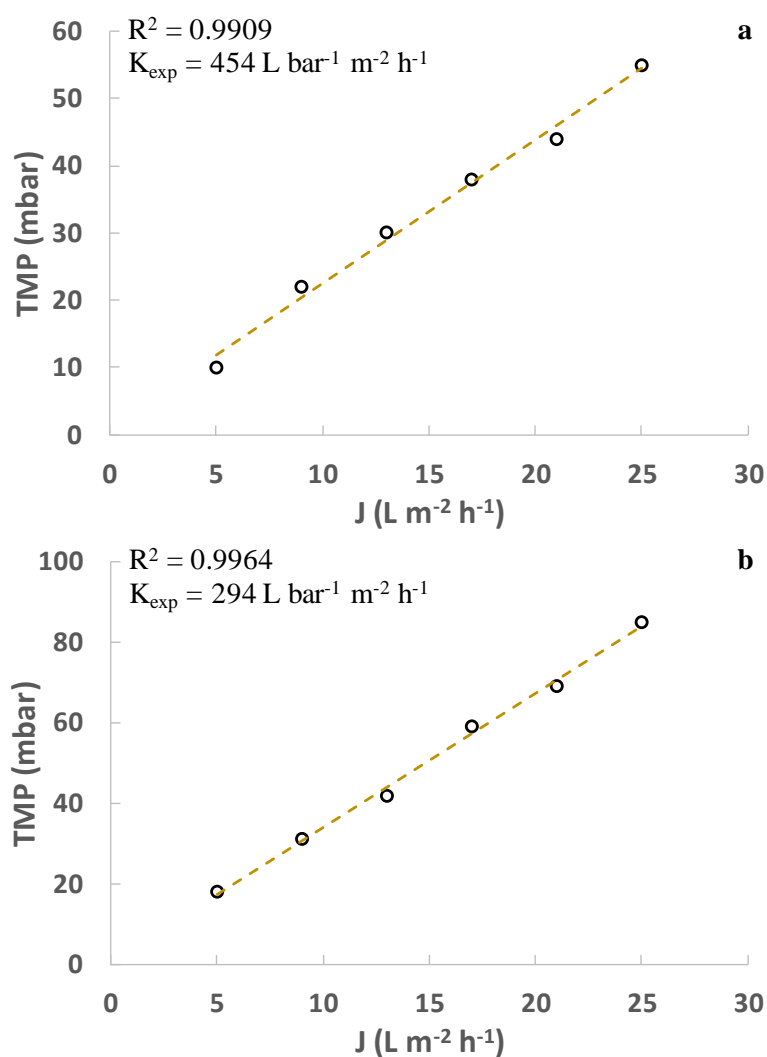

Figure S1. Original permeability of virgin membranes: (a) MF membrane and (b) UF membrane. Dots represent experimentally determined permeability while the lines the linear fits. TMP: transmembrane pressure, J: Permeate flux,  $R^2$ : square of Pearson correlation,  $K_{\text{exp}}$ : membrane permeability average value.
